# Supplementary material for: TERRA-LSD1 phase separation promotes R-loop formation for telomere maintenance in ALT cancer cells
Source: PubMed Central journal article supplement (PMC10925046; doi:10.1038/s41467-024-46509-z), 2024-03-09
Supplement: 41467_2024_46509_MOESM3_ESM.pdf [file 41467_2024_46509_MOESM3_ESM.pdf]

## Description of Additional Supplementary Files

### File Name: Supplementary Movie 1

**Description:** Recruiting LSD1<sup>ΔIDR</sup> to telomeres without siTERRA. Movie for Fig. 4b. Left: composite of LSD1<sup>ΔIDR</sup> (red) and TRF1 (green), middle: mCh-eDHFR-LSD1, right: Halo-GFP-TRF1. TFH was added to cells after the first time point to induce dimerization.

### File Name: Supplementary Movie 2

**Description:** Recruiting LSD1<sup>ΔIDR</sup> to telomeres in HeLa1.3 cells. Movie for Supplementary Fig. 5f. Left: composite of LSD1<sup>ΔIDR</sup> (red) and TRF1 (green), middle: mCh-eDHFR-LSD1, right: Halo-GFP-TRF1. TFH was added to cells after the first time point to induce dimerization.

### File Name: Supplementary Movie 3

**Description:** Recruiting GFP-eDHFR-LSD1<sup>IDR</sup> to telomeres. Halo-TRF1 is co-transfected. Movie for Supplementary Fig. 5a. TFH was added to cells after the first time point to induce dimerization.

### File Name: Supplementary Movie 4

**Description:** Recruit GFP-eDHFR-LSD1<sup>ΔIDR</sup> to telomeres. Halo-TRF1 is transfected. Movie for Supplementary Fig. 5a. TFH was added to cells after the first time point to induce dimerization.

### File Name: Supplementary Movie 5

**Description:** Recruiting LSD1<sup>ΔIDR</sup> to telomeres with siTERRA (100 nM, 24 hr). Movie for Fig. 4b. Left: composite of LSD1<sup>ΔIDR</sup> (red) and TRF1 (green), middle: mCh-eDHFR-LSD1<sup>ΔIDR</sup>, right: Halo-GFP-TRF1. TFH was added to cells after the first time point to induce dimerization.

### File Name: Supplementary Movie 6

**Description:** Recruiting LSD1<sup>ΔIDR, 3KE</sup> to telomeres. Movie for Fig. 4c. Left: composite of LSD1 (red) and TRF1 (green), middle: mCh-eDHFR-LSD1<sup>ΔIDR, 3KE</sup>, right: Halo-GFP-TRF1. TFH was added to cells after the first time point to induce dimerization.
